# Supplementary material for: Unique spatiotemporal activation pattern of Cdc42 by Gef1 and Scd1 promotes different events during cytokinesis
Source: PubMed Central journal article supplement — Mol Biol Cell. 2016 Apr 15;27(8):1235–45. doi: 10.1091/mbc.E15-10-0700 (PMC4831878; doi:10.1091/mbc.e15-10-0700), 2016-04-15
Supplement: supp_E15-10-0700v1_CombinedSupMats.pdf [file supp_E15-10-0700v1_CombinedSupMats.pdf]

# Supplemental Materials

*Molecular Biology of the Cell*

Wei et al.

## Supplementary Material

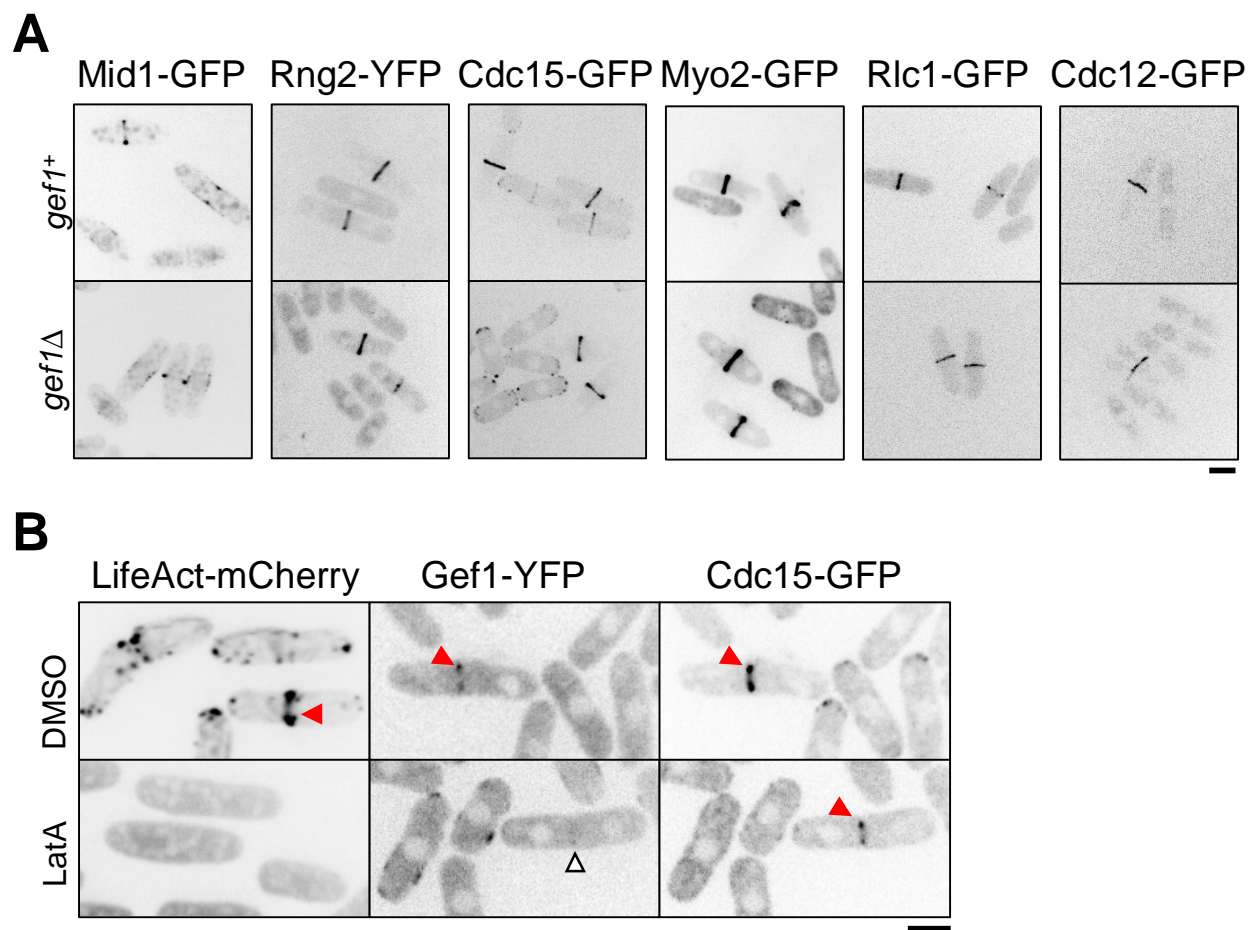

**Figure S1: A. Gef1 is not required for recruitment of actomyosin ring assembly proteins.** Localization of Mid1-GFP, Rng2-YFP, Cdc15-GFP, Myo2-GFP, Rlc1-GFP and Cdc12-GFP in *gef1*<sup>+</sup> and *gef1*Δ cells were observed at the site of cell division. **B. Gef1 localization to the division site is actin dependent.** Cell expressing LifeAct-mCherry or Gef1-3xYFP and Cdc15-GFP treated with DMSO and 100 μM of Latrunculin A (LatA) for 30 mins. Red arrowheads indicate the presence and white arrowheads indicate absence of signals at cell division site. Bars, 5 μm.

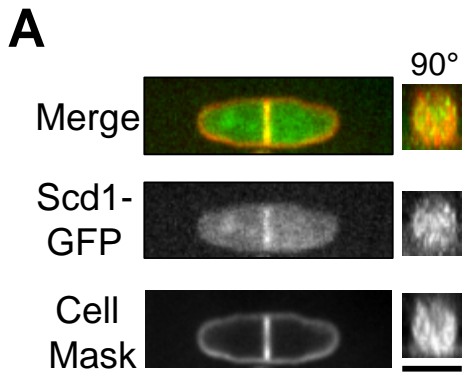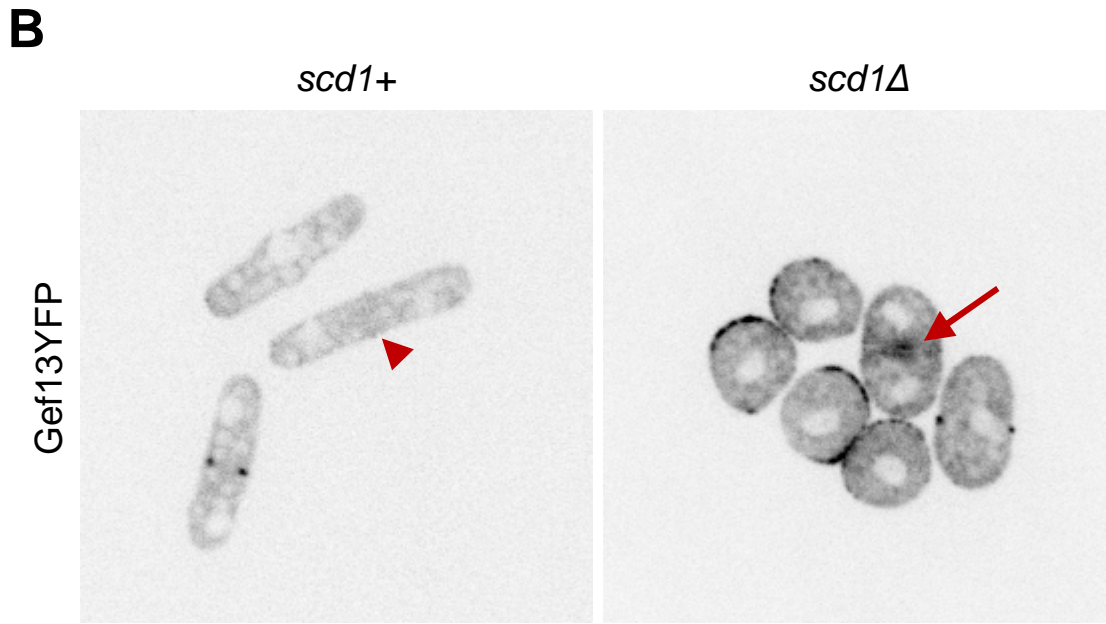

**Figure S2 : (A) Scd1 localizes to the ingressing membrane during cytokinesis.** Scd1-GFP expressing cells were stained with the membrane dye Cell Mask. 3D reconstructed cells division site is shown after 90° rotation. **(B) Scd1 is required for proper Gef1 localization at the division site and cell cortex.** Gef1-3xYFP expressing *scd1+* and *scd1Δ* cells were imaged. Red arrowhead shows loss of Gef1-3xYFP signal at the site of cell division post ring constriction. Red arrow shows Gef1-3xYFP at the division site post ring constriction. Gef1-3xYFP signal in non-dividing cells is more depolarized and randomly distributed at the cell cortex.

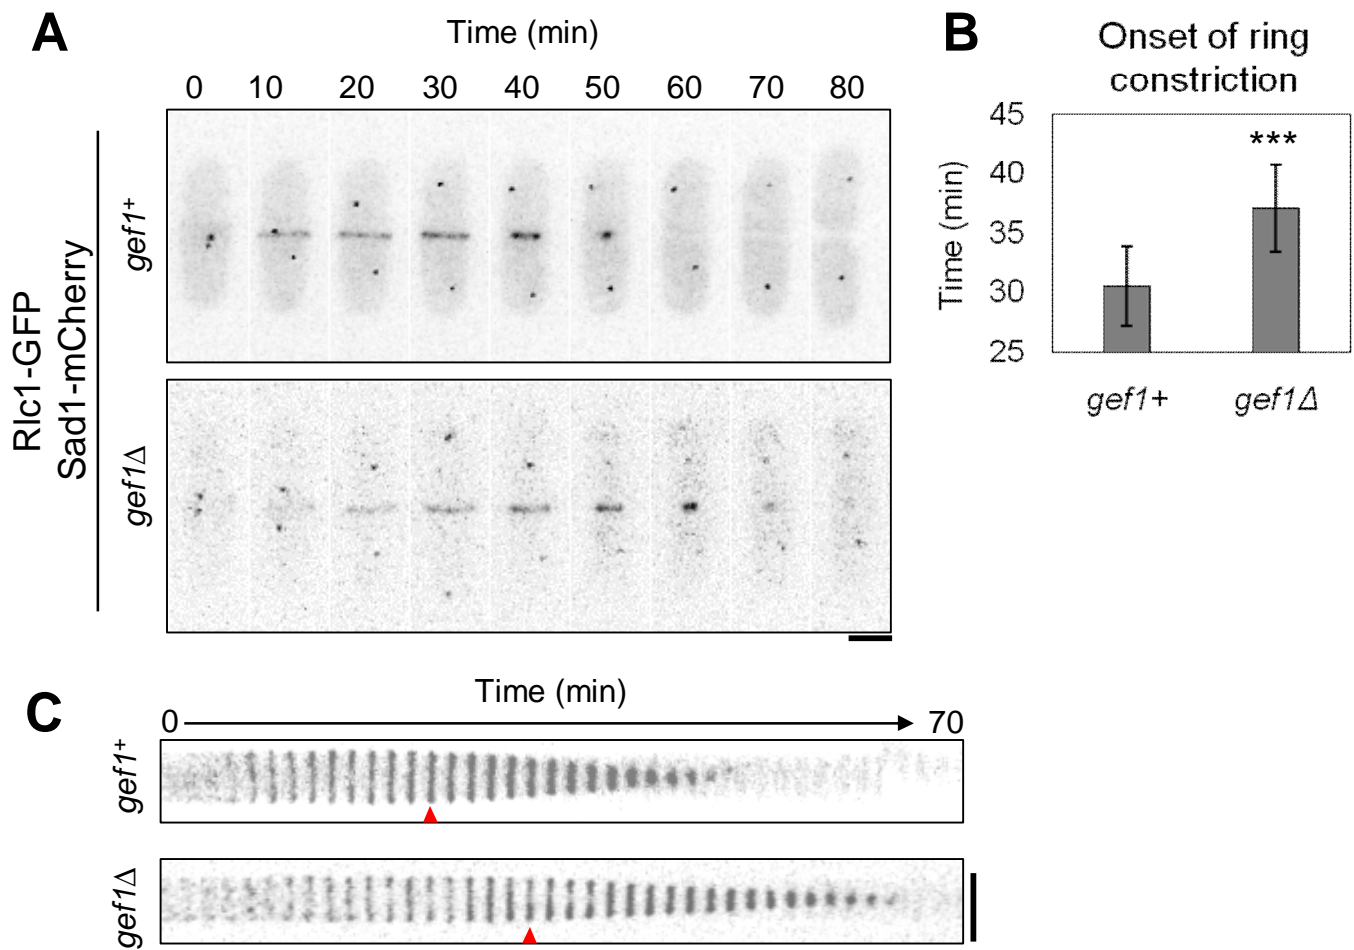

**Figure S3: Gef1 is required for timely onset of actomyosin ring constriction.** **A.** Actomyosin ring protein Rlc1-GFP and spindle pole body marker Sad1-mCherry observed over time in *gef1+* and *gef1Δ* cells at the site of cell division during cytokinesis. **B.** Quantification of onset of ring constriction in *gef1+* and *gef1Δ* cells. Student's t-test, \*\*\* $p < 0.001$ . **C.** Kymograph of Rlc1-GFP at the actomyosin ring overtime since onset of spindle pole body separation. Scale bar, 5  $\mu$ m. m, minutes.

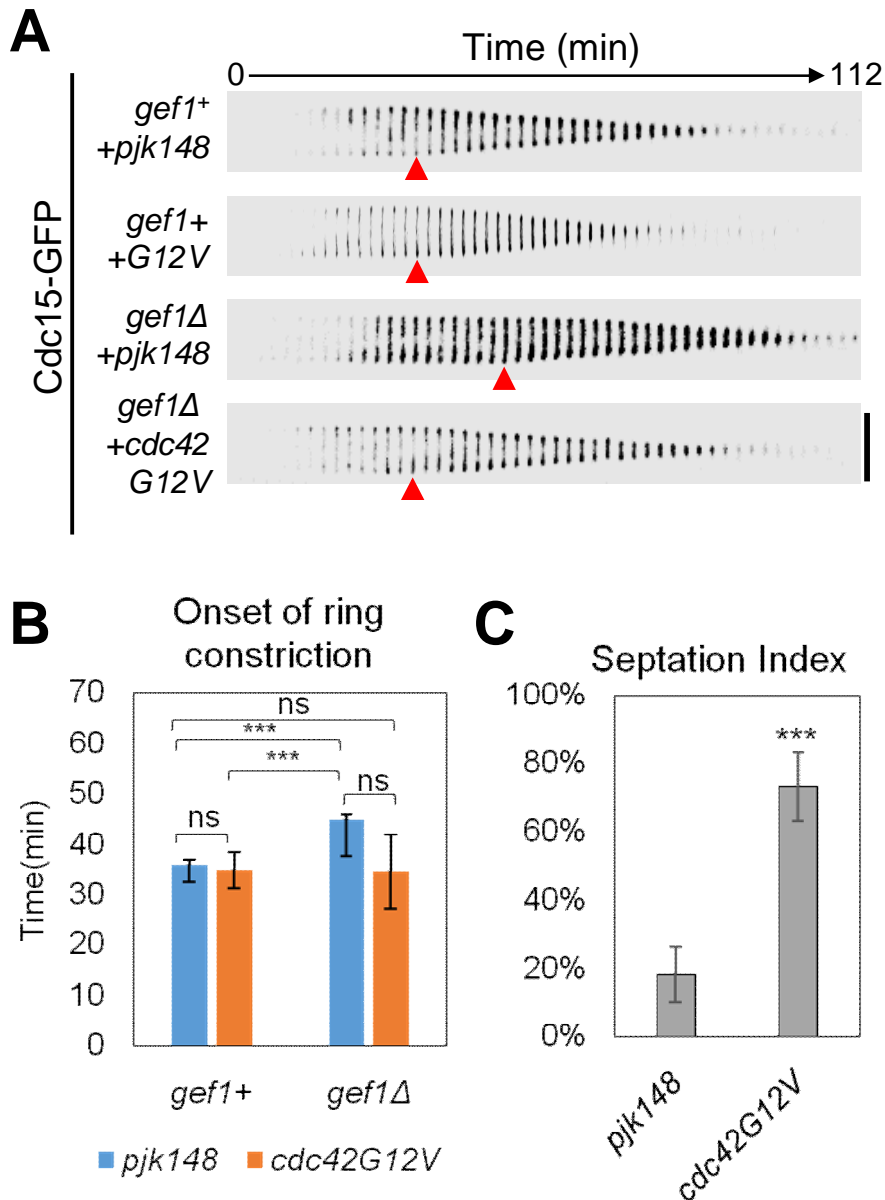

**Figure S4: Constitutively active Cdc42 rescues delay in onset of ring constriction in *gef1Δ* cells.** (A) Kymographs of cytokinetic ring represented by Cdc15-GFP in indicated cells.

Red arrowheads- onset of cytokinetic ring constriction. Bars, 5  $\mu$ m. (B) Quantification of onset of cytokinetic ring constriction as shown in A.  $n > 16$  cells. (C) Septation index of control and Cdc41G12V overexpressing cells.  $n > 16$ . \*\*\*,  $p < 0.001$ . ns, not significant. Error bars, SD.

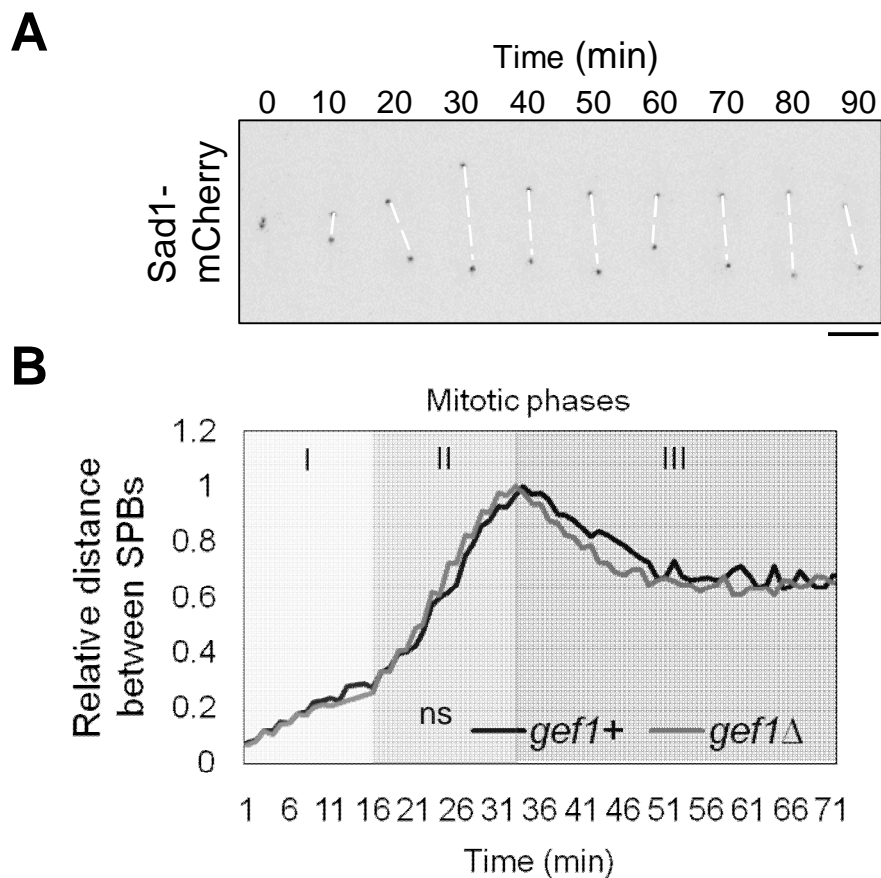

**Figure S5: Gef1 does not affect mitotic events.** **A.** SPB dynamics since onset of anaphase by Sad1-mCherry. White dashed lines indicate the distance between the two SPBs each time point. Bar, 5  $\mu$ m. **B.** Quantification of the distance between two spindle pole bodies over time in *gef1+* and *gef1*  $\Delta$  cells.  $n > 14$  cells. Three stages are defined by SPBs' distance: I, Anaphase A; II, Anaphase B; III, Telophase. ns, not significant. m, minutes.

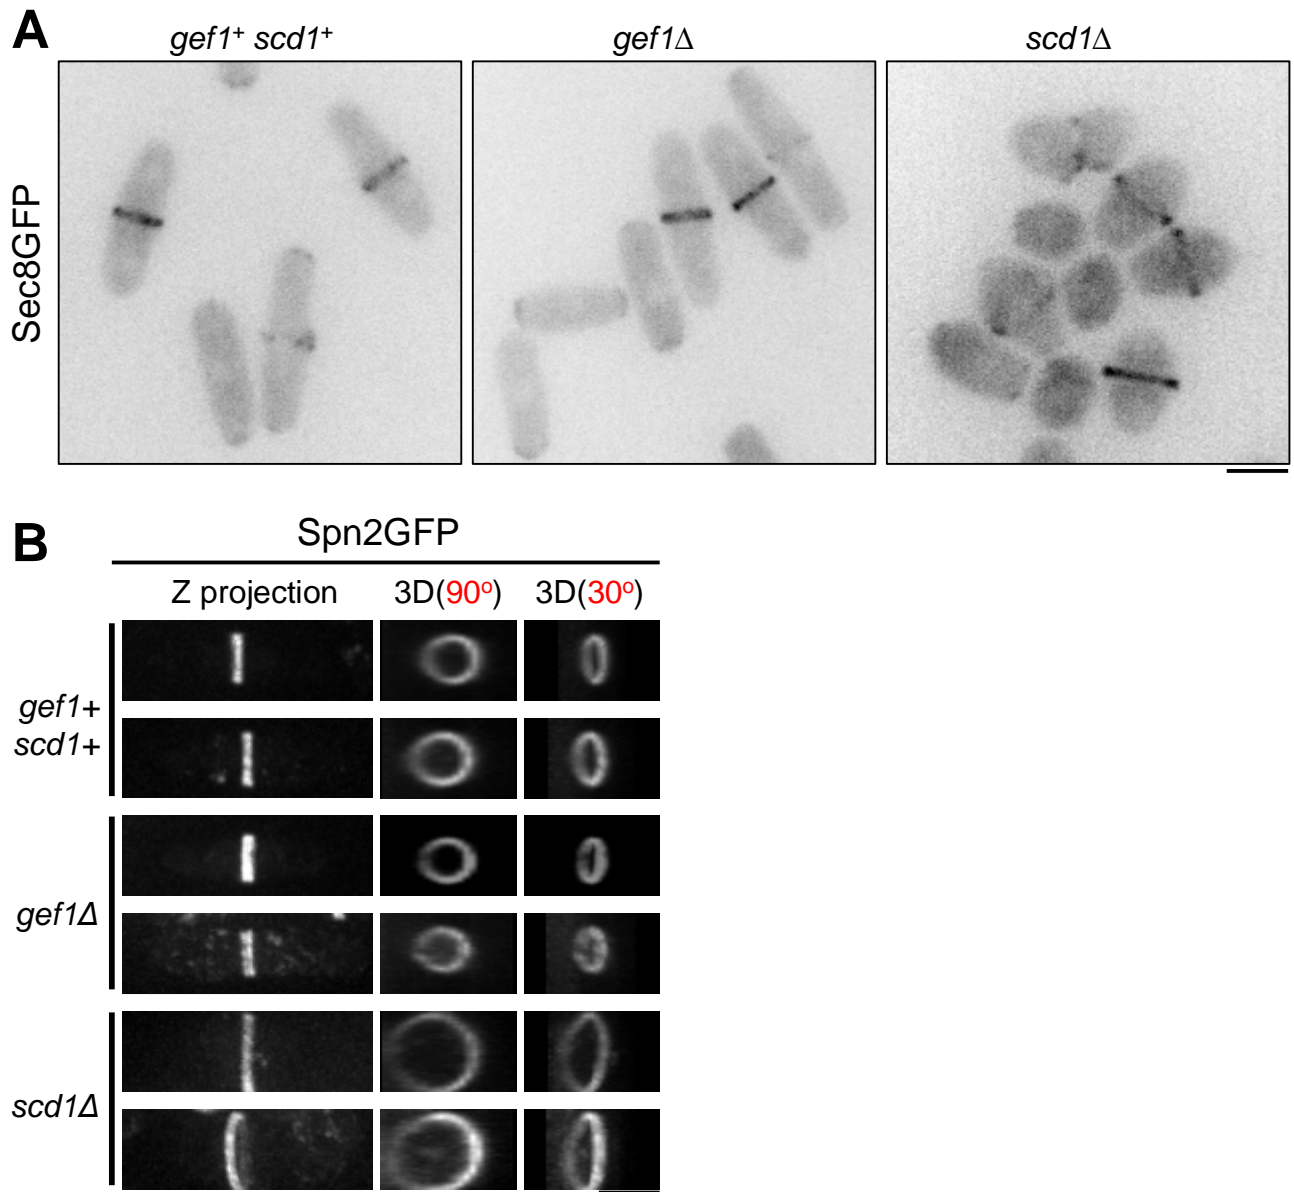

**Figure S6. Gef1 and Scd1 do not affect the localization of the Exocyst complex or the septin ring during cytokinesis.** (A) Cells as indicated expressing the exocyst protein Sec8-GFP were imaged. (B) Indicated cells expressing the septin ring protein Spn2-GFP were analyzed during cytokinesis. 3D reconstructed rings rotated at 90° and 30° are shown. Bars, 5 $\mu$ m

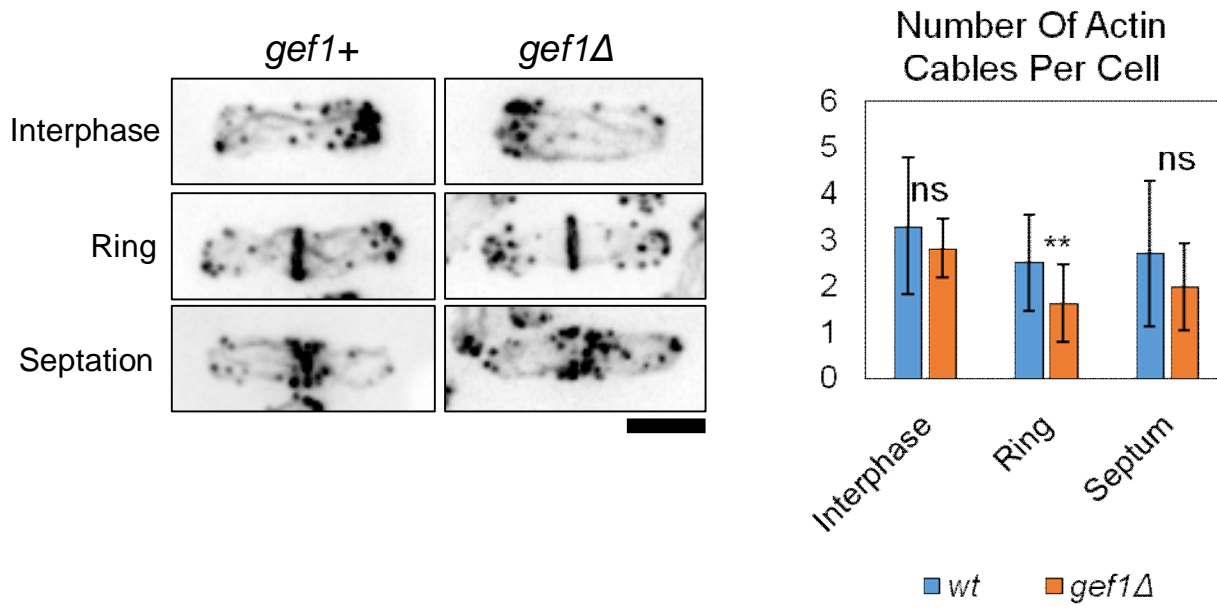

**Figure S7: Gef1 is required for non-medial actin cables during cytokinesis.**

Quantification of actin cables observed in Alexa-fluor phalloidin stained *gef1+* and *gef1Δ* cells during interphase, ring phase of cytokinesis and during the septum phase.  $n > 10$ . \*\*,  $p = 0.004$ . ns, not significant. Error bars, SD.



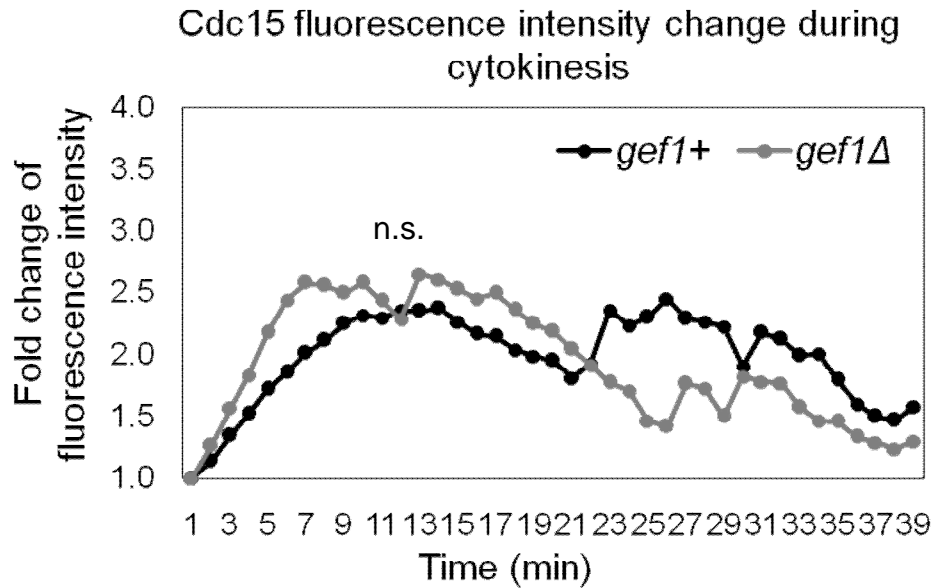

**Figure S8: Gef1 does not affect the recruitment of the actomyosin ring protein Cdc15 during ring maturation.** Quantification of fold increase in Cdc15-GFP levels at the cell division site in *gef1+* and *gef1Δ* cells over time. Time 0 is onset of maturation phase as determined by the first appearance of a fully assembled Cdc15-GFP ring. Student's t-test; ns, not significant. min, minutes.

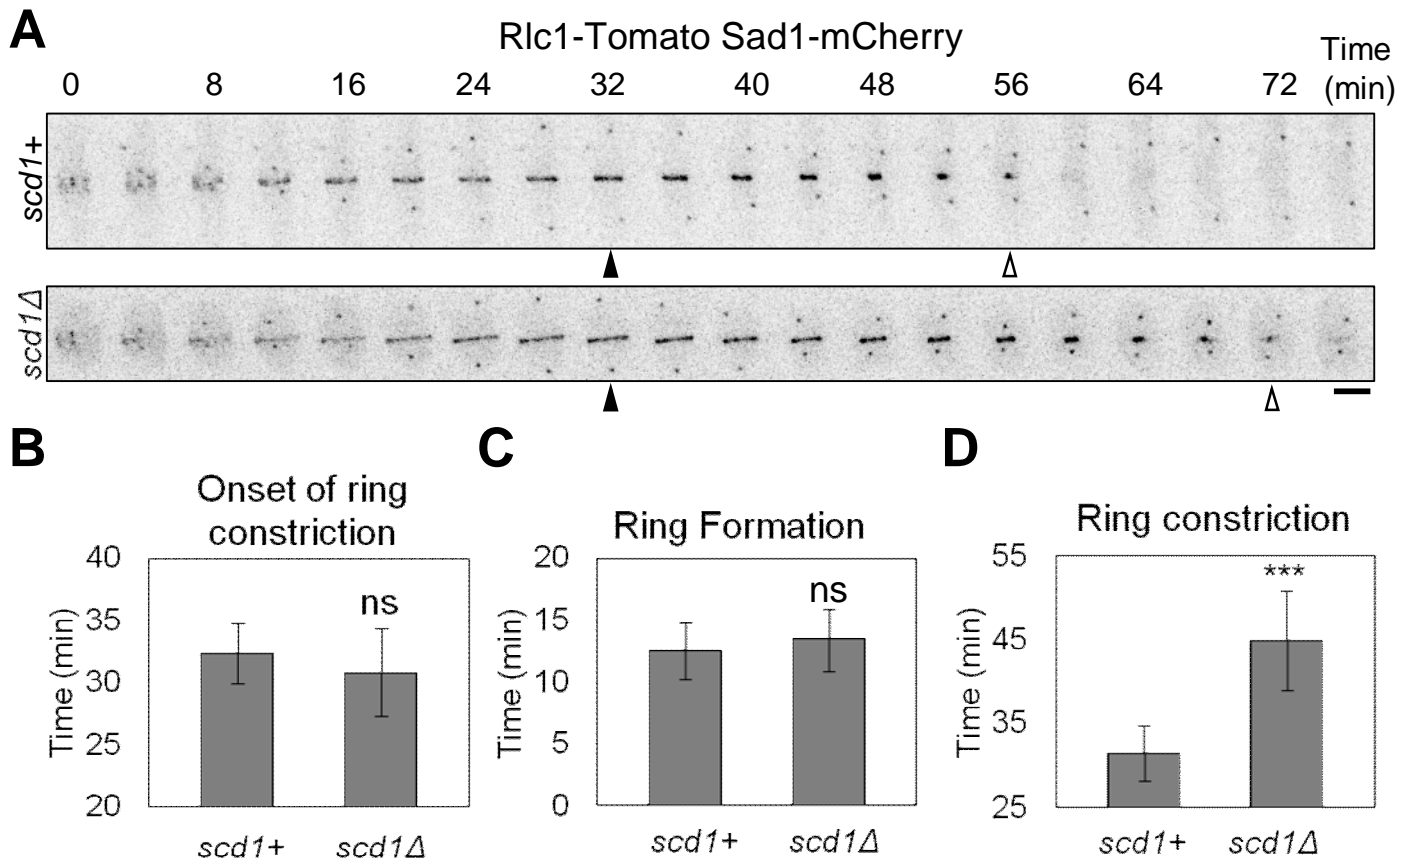

**Figure S9: Scd1 is not required for timely onset of actomyosin ring constriction. (A)**

Actomyosin ring protein Rlc1-GFP and spindle pole body marker Sad1-mCherry observed over time in *scd1+* and *scd1Δ* cells at the site of cell division during cytokinesis. Bar, 5  $\mu$ m. **(B)** Quantification of onset of ring constriction in *scd1+* and *scd1Δ* cells. **(C)** Quantification of actomyosin ring assembly in *scd1+* and *scd1Δ* cells. ns, not significant. **(D)** Quantification of duration of actomyosin ring constriction in *scd1+* and *scd1Δ* cells. \*\*\*,  $p < 0.0001$ . min, minutes.

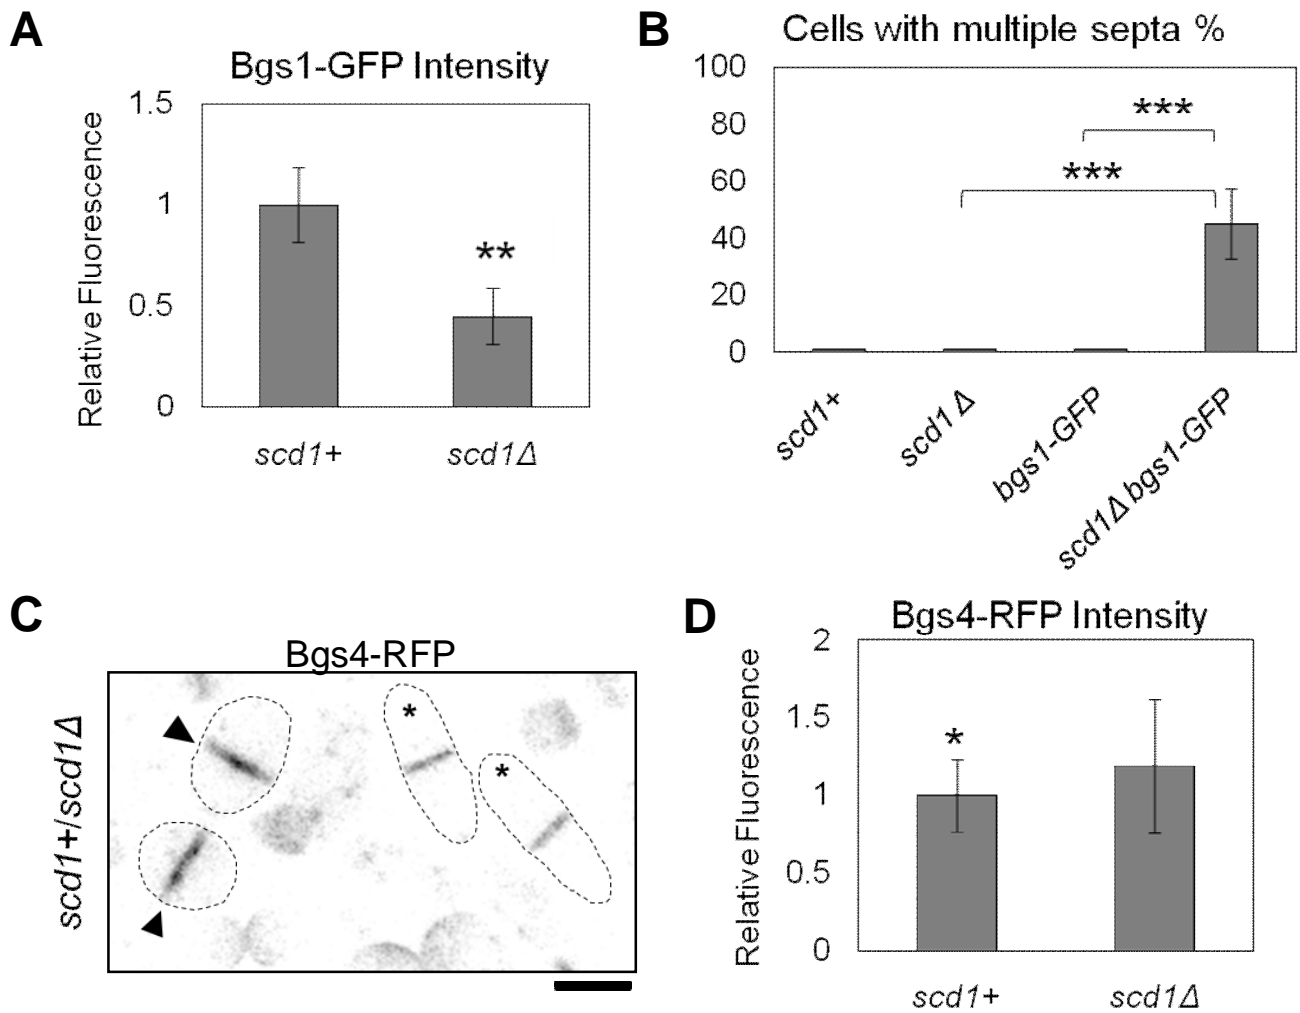

**Figure S10. Scd1 is required for normal septum formation.** (A) Quantification of Bgs1-GFP levels at the cell division site in *scd1+* and *scd1Δ* cells as shown in Figure 8A.  $n>23$  \*\*,  $p=0.0014$ . (B) Quantification of multi-septated cells over total septated cells in indicated cells as shown in Figure 8B.  $n>286$ . \*\*\*,  $p=0.0001$ . (C) Cells expressing Bgs4-RFP in *scd1+* and *scd1Δ* cells analyzed in the same field. *scd1+* cells are depicted by asterisks and *scd1Δ* cells are depicted by arrowheads. Bars, 5  $\mu$  m (D) Quantification of Bgs4-RFP levels at the cell division site in the indicated cells as shown in C.  $n>21$ . \*\*,  $p=0.04$ . Error bars, SD.

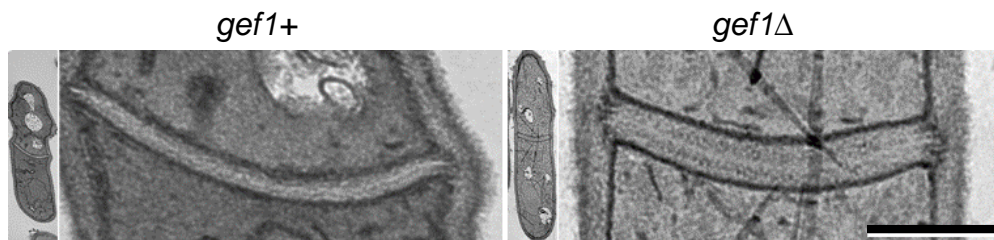

**Figure S11. Loss of *gef1* does not show septum morphology defects but shows thicker septum.** Electron microscopy images of *gef1*<sup>+</sup> and *gef1*  $\Delta$  cells. Bar, 1  $\mu$ m.

## SUPPLEMENTARY MOVIE LEGENDS

Movie S1: **Spatiotemporal localization of CRIB-3XGFP during cytokinesis.** Left panel shows CRIB-3XGFP. Right panel shows cytokinetic ring marker Rlc1-Tomato and SPB marker Sad1-mCherry. Frame interval is 2 minute. Frame rate is 2 fps.

Movie S2: **Spatiotemporal localization of CRIB-3XGFP in *gef1Δ* cells during cytokinesis.** Left panel shows CRIB-3XGFP. Right panel shows cytokinetic ring marker Rlc1-Tomato and SPB marker Sad1-mCherry. Frame interval is 2 minute. Frame rate is 2 fps.

Movie S3: **Spatiotemporal localization of CRIB-3XGFP in *scd1Δ* cells during cytokinesis.** Left panel shows CRIB-3XGFP. Right panel shows cytokinetic ring marker Rlc1-Tomato and SPB marker Sad1-mCherry. Frame interval is 2 minute. Frame rate is 2 fps.

Movie S4: **Loss of Gef1 delays onset of ring constriction.** Cdc15-GFP shows the cytokinetic ring in the cell division site in upper panel. Sad1-mCherry as SPB marker is shown in the bottom panel. Left panel shows a *gef1<sup>+</sup>* cell, right panel shows a *gef1Δ* cell. Both *gef1<sup>+</sup>* and *gef1Δ* movies start from initial SPB separation. Frame interval is 2 minute. Frame rate is 2 fps.

Movie S5: **Bgs1 recruitment to the division site is delayed in *gef1Δ* cells.** Bgs1-GFP at the cell division site is shown in upper panel. Bottom panel shows cytokinetic ring marker Rlc1-Tomato and SPB marker Sad1-mCherry. Left panel shows a *gef1<sup>+</sup>* cell, right panel is a *gef1Δ* cell. Both *gef1<sup>+</sup>* and *gef1Δ* movies start playing from separation of SPBs. Sad1-mCherry as SPB marker was used. Frame interval is 2 minute. Frame rate is 2 fps.

Movie S6: **Loss of Scd1 delays ring constriction but not onset of ring constriction.** Rlc1-Tomato shows the cytokinetic ring in the cell division site. Sad1-mCherry represents SPBs separation. Left panels show bright field images. Right panels shows both Rlc1-Tomato and Sad1-mCherry. Upper panel shows a *scd1<sup>+</sup>* cell, bottom panel shows a *scd1Δ* cell. Both *scd1<sup>+</sup>*

and *scd1Δ* movies start playing from separation of SPBs. Frame interval is 2 minute. Frame rate is 2 fps.

Table S1. *S. pombe* strains used in this study.

| Strain  | Genotype                                                                                                                                           | Source                              |
|---------|----------------------------------------------------------------------------------------------------------------------------------------------------|-------------------------------------|
| PN972   | <i>h<sup>-</sup></i>                                                                                                                               | <i>P. Nurse</i>                     |
| PPG5660 | <i>h<sup>+</sup> cdc42-1625-kanMX leu1-32 ura4-D18</i>                                                                                             | ( <i>Martin et al., 2007</i> )      |
| YMD208  | <i>cdc15-Tomato-NAT<sup>r</sup> gef1-3xYFP-kanMX6 ade6-M216/704 his7<sup>+</sup></i>                                                               | <i>This study</i>                   |
| YMD373  | <i>cdc15-Tomato-NAT<sup>r</sup> scd1-3xGFP-kanMX ad6-m216 leu1-32 ura4-d18 his7<sup>+</sup></i>                                                    | <i>This study</i>                   |
| MBY6843 | <i>h<sup>+</sup> LifeAct-mCherry: leu<sup>+</sup> ade6-M216 leu1-32 ura4-D18</i>                                                                   | ( <i>Huang et al., 2012</i> )       |
| YMD317  | <i>CRIB-GFP-ura4<sup>+</sup> rlc1-Tomato-NAT<sup>r</sup> sad1-mCherry:kanMX ade6-M21X leu1-32 ura4-D18 his7<sup>+</sup></i>                        | <i>This study</i>                   |
| YMD488  | <i>Δgef1::ura4<sup>+</sup> CRIB-GFP-ura4<sup>+</sup>,rlc1-Tomato-NAT<sup>r</sup> sad1-mCherry:kanMX ura4-D18 leu1-32 his7<sup>+</sup></i>          | <i>This study</i>                   |
| YMD530  | <i>scd1::ura4<sup>+</sup> CRIB-GFP-ura4<sup>+</sup> rlc1-Tomato-NAT<sup>r</sup> sad1-mCherry:kanMX ade6-M21X leu1-32 ura4-D18 his7<sup>+</sup></i> | <i>This study</i>                   |
| YMD133  | <i>cdc15-GFP: kanMX6 sad1-mCherry:kanMX ade6-M21X leu1-32 ura4-D18</i>                                                                             | <i>This study</i>                   |
| YMD131  | <i>Δgef1::ura4<sup>+</sup> cdc15-GFP: kanMX6 sad1-mCherry:kanMX ade6-M21X leu1-32 ura4-D18</i>                                                     | <i>This study</i>                   |
| YMD542  | <i>Δgef1::ura4<sup>+</sup> bgs1D::ura4 Pbgs1::GFP-bgs1:leu1<sup>+</sup> Rlc1-Tomato-NAT<sup>r</sup> Sad1-mCherry:kanMX leu1-32 ura4-D18</i>        | <i>This study</i>                   |
| YMD546  | <i>bgs1D::ura4 Pbgs1::GFP-bgs1:leu1<sup>+</sup> Rlc1-Tomato-NAT<sup>r</sup> Sad1-mCherry:kanMX leu1-32 ura4-D18</i>                                | <i>This study</i>                   |
| YMD498  | <i>cdc15-GFP: kanMX6 sad1-mCherry:kanMX ade6-M21X leu1-32 ura4-D18 pj148-nmt41x-leu1<sup>+</sup></i>                                               | <i>This study</i>                   |
| YMD473  | <i>Δgef1::ura4<sup>+</sup> cdc15-GFP: kanMX6 sad1-mCherry:kanMX ade6-M21X leu1-32 ura4-D18 pj148-nmt41x-leu1<sup>+</sup></i>                       | <i>This study</i>                   |
| YMD474  | <i>Δgef1::ura4<sup>+</sup> cdc15-GFP: kanMX6 sad1-mCherry:kanMX ade6-M21X leu1-32 ura4-D18 pj148-nmt41x-cdc42G12V-leu1<sup>+</sup></i>             | <i>This study</i>                   |
| PPG2601 | <i>h<sup>+</sup> Δgef1::ura4<sup>+</sup> ura4-D18 leu1-32</i>                                                                                      | ( <i>Coll et al., 2003</i> )        |
| KLG2955 | <i>h<sup>-</sup> mid1Δ::ura4<sup>+</sup></i>                                                                                                       | <i>K. Gould</i>                     |
| YMD377  | <i>Δgef1::ura4<sup>+</sup> mid1Δ::ura4<sup>+</sup> ura4-D18 leu1-32</i>                                                                            | <i>This study</i>                   |
| KGY3019 | <i>h<sup>+</sup> cdc15-GFP: kanMX6 ade6-M210 leu1-32 ura4-D18</i>                                                                                  | ( <i>Carnahan and Gould, 2003</i> ) |
| YMD61   | <i>Δgef1::ura4<sup>+</sup> cdc15-GFP: kanMX6 ade6-M210 leu1-32 ura4-D18</i>                                                                        | <i>This study</i>                   |

|          |                                                                                                                     |                            |
|----------|---------------------------------------------------------------------------------------------------------------------|----------------------------|
| PN527    | <i>h<sup>-</sup> ade6-M210 leu1-32 his3-D1 ura4-D18</i>                                                             | P. Nurse                   |
| FV242+   | <i>h<sup>90</sup> leu1 ura4-d18 ade6 h210 scd1::ura4</i>                                                            | (Li et al., 2000)          |
| PPG3750  | <i>h<sup>-</sup> bgs1D::ura4 Pbgs1::GFP-bgs1:leu1 leu1-32 ura4-D18 hys3-D1</i>                                      | (Cortes et al., 2002)      |
| YMD501   | <i>h<sup>90</sup> scd1::ura4 bgs1D::ura4 Pbgs1::GFP-bgs1:leu1<sup>+</sup> leu1-32 ura4-D18 hys3-D1</i>              | This study                 |
| PPG4608  | <i>h<sup>-</sup> bgs4::ura4 Pbgs4::GFP-bgs4:leu1 leu1-32 ura4-D18 hys3-D1</i>                                       | (Cortes et al., 2005)      |
| YMD504   | <i>h<sup>90</sup> scd1::ura4<sup>+</sup> bgs4::ura4 Pbgs4::GFP-bgs4:leu1 leu1-32 ura4-D18 hys3-D1</i>               | This study                 |
| YMD64    | <i>Δgef1::ura4<sup>+</sup> mid1-GFP ura4-D18 leu1-32</i>                                                            | This study                 |
| YDM403   | <i>h<sup>-</sup> mid1-GFP:kanMX6 ade6-M210 leu1-32 ura4-D18</i>                                                     | (Bahler et al., 1998)      |
| YMD76    | <i>Δgef1::ura4<sup>+</sup> KanMX::YFP-rng2 ade6-M21X ura4-D18 leu1-32</i>                                           | This study                 |
| JW937    | <i>h<sup>-</sup> kanMX6-Prng2-mYFP-rng2 ade6-M210 leu1-32 ura4-D18</i>                                              | (Wu et al., 2003)          |
| KG Y3019 | <i>cdc15-GFP::kanMX, ade6-m210 ura4-d18 leu1-32</i>                                                                 | (Carnahan and Gould, 2003) |
| YMD183   | <i>Δgef1::ura4<sup>+</sup> kanMX-GFP-myo2 ade6-M210 ura4-D18 leu1-32</i>                                            | This study                 |
| JW766    | <i>kanMX-GFP-myo2 ade6-M210 leu1-32 ura4-D18</i>                                                                    | (Wu et al., 2003)          |
| YMD156   | <i>Δgef1::ura4<sup>+</sup> rlc1-GFP:ura4<sup>+</sup> ade6-M210 ura4-D18 leu1-32</i>                                 | This study                 |
| KG Y1278 | <i>h<sup>+</sup> rlc1-GFP:ura4<sup>+</sup> ade6-M210 leu1-32 ura4-D18</i>                                           | (Naqvi et al., 2000)       |
| YMD204   | <i>Δgef1::ura4<sup>+</sup> rlc1-GFP:ura4<sup>+</sup> sad1-mCherry:kanMX ade6-M210 ura4-D18 leu1-32</i>              | This study                 |
| YMD165   | <i>rlc1-GFP:ura4<sup>+</sup> sad1-mCherry:kanMX ade6-M210 ura4-D18 leu1-32</i>                                      | This study                 |
| YMD275   | <i>bgs4::ura4 Pbgs4::RFP-bgs4:leu1 cdc11-GFP:ura4<sup>+</sup> ade6-M210 leu1-32 ura4-D18</i>                        | This study                 |
| YMD288   | <i>Δgef1::ura4<sup>+</sup> bgs4::ura4 Pbgs4::GFP-bgs4:leu1 rlc1-GFP:ura4<sup>+</sup> ade6-M210 leu1-32 ura4-D18</i> | This study                 |
| YMD 457  | <i>Δgef1::ura4<sup>+</sup> bgs1D::ura4 Pbgs1::GFP-bgs1:leu1 leu1-32 ura4-D18 hys3-D1</i>                            | This study                 |
| YMD590   | <i>myo52GFP sad1-mCherry:kanMX ade6-M210 ura4-D18 leu1-32</i>                                                       | This study                 |
| YMD594   | <i>Δgef1::ura4<sup>+</sup> myo52GFP sad1-mCherry:kanMX ade6-M210 ura4-D18 leu1-32</i>                               | This study                 |
| YMD 600  | <i>bgs4::ura4 Pbgs4::GFP-bgs4:leu1 leu1-32 ura4-D18 hys3-</i>                                                       | This study                 |



|         |                                                                                                                   |                          |
|---------|-------------------------------------------------------------------------------------------------------------------|--------------------------|
|         | <i>D1 cdc11-GFP:kanR ade6-M21x</i>                                                                                |                          |
| YMD617  | <i>Δgef1::ura4<sup>+</sup> bgs4::ura4 P bgs4::GFP-bgs4:leu1 leu1-32 ura4-D18 hys3-D1 cdc11-GFP:kanR ade6-M21x</i> | <i>This study</i>        |
| FV1405  | <i>scd1::ura4<sup>+</sup> Gef13yfp</i>                                                                            | <i>This study</i>        |
| YMD566  | <i>Pjk148cdc42g12v cdc15gfp sad1-mCherry:kanMX ade6-M210 ura4-D18 leu1-32</i>                                     | <i>This study</i>        |
| YMD606  | <i>Pjk148 ade6-M210 leu1-32 his3-D1 ura4-D18</i>                                                                  | <i>This study</i>        |
| YMD610  | <i>Pjk148-nmt41-cdc42G12V ade6-M210 leu1-32 his3-D1 ura4-D18</i>                                                  | <i>This study</i>        |
| YSM1720 | <i>sec8-GFP-ura4<sup>+</sup></i>                                                                                  | <i>Sophie Martin</i>     |
| YMD84   | <i>Δgef1::ura4<sup>+</sup> sec8-GFP-ura4<sup>+</sup></i>                                                          | <i>This study</i>        |
| YMD508  | <i>scd1::ura4<sup>+</sup> sec8-GFP-ura4<sup>+</sup></i>                                                           | <i>This study</i>        |
| Spn2GFP | <i>Spn2-GFP::KanR Leu 1-32, ura4-D18, ade 6-m210 h-</i>                                                           | <i>(An et al., 2004)</i> |
| YMD613  | <i>Δgef1::ura4<sup>+</sup> Spn2-GFP::KanR Leu 1-32, ura4-D18, ade6-m210</i>                                       | <i>This study</i>        |
| YMD615  | <i>scd1::ura4<sup>+</sup> Spn2-GFP::KanR Leu 1-32, ura4-D18, ade6-m210</i>                                        | <i>This study</i>        |
| YMD527  | <i>rlc1-tomato-NATr ade6-M21X leu1-32 his7+ sad1-mCherry:kanMX ura4-D18</i>                                       | <i>This study</i>        |
| YMD625  | <i>scd1::ura4<sup>+</sup> rlc1-tomato-NATr ade6-M216 leu1-32 ura4-D18 his7+ sad1mcherry</i>                       | <i>This study</i>        |

---

## REFERENCES

- An, H., J.L. Morrell, J.L. Jennings, A.J. Link, and K.L. Gould. 2004. Requirements of fission yeast septins for complex formation, localization, and function. *Molecular biology of the cell*. 15:5551-5564.
- Bahler, J., A.B. Steever, S. Wheatley, Y. Wang, J.R. Pringle, K.L. Gould, and D. McCollum. 1998. Role of polo kinase and Mid1p in determining the site of cell division in fission yeast. *The Journal of cell biology*. 143:1603-1616.
- Carnahan, R.H., and K.L. Gould. 2003. The PCH family protein, Cdc15p, recruits two F-actin nucleation pathways to coordinate cytokinetic actin ring formation in *Schizosaccharomyces pombe*. *The Journal of cell biology*. 162:851-862.
- Coll, P.M., Y. Trillo, A. Ametzazurra, and P. Perez. 2003. Gef1p, a new guanine nucleotide exchange factor for Cdc42p, regulates polarity in *Schizosaccharomyces pombe*. *Molecular biology of the cell*. 14:313-323.
- Cortes, J.C., E. Carnero, J. Ishiguro, Y. Sanchez, A. Duran, and J.C. Ribas. 2005. The novel fission yeast (1,3)beta-D-glucan synthase catalytic subunit Bgs4p is essential during both cytokinesis and polarized growth. *Journal of cell science*. 118:157-174.
- Cortes, J.C., J. Ishiguro, A. Duran, and J.C. Ribas. 2002. Localization of the (1,3)beta-D-glucan synthase catalytic subunit homologue Bgs1p/Cps1p from fission yeast suggests that it is involved in septation, polarized growth, mating, spore wall formation and spore germination. *Journal of cell science*. 115:4081-4096.
- Huang, J., Y. Huang, H. Yu, D. Subramanian, A. Padmanabhan, R. Thadani, Y. Tao, X. Tang, R. Wedlich-Soldner, and M.K. Balasubramanian. 2012. Nonmedially assembled F-actin cables incorporate into the actomyosin ring in fission yeast. *The Journal of cell biology*. 199:831-847.
- Li, Y.C., C.R. Chen, and E.C. Chang. 2000. Fission yeast Ras1 effector Scd1 interacts with the spindle and affects its proper formation. *Genetics*. 156:995-1004.
- Martin, S.G., S.A. Rincon, R. Basu, P. Perez, and F. Chang. 2007. Regulation of the formin for3p by cdc42p and bud6p. *Molecular biology of the cell*. 18:4155-4167.
- Naqvi, N.I., K.C. Wong, X. Tang, and M.K. Balasubramanian. 2000. Type II myosin regulatory light chain relieves auto-inhibition of myosin-heavy-chain function. *Nature cell biology*. 2:855-858.
- Wu, J.Q., J.R. Kuhn, D.R. Kovar, and T.D. Pollard. 2003. Spatial and temporal pathway for assembly and constriction of the contractile ring in fission yeast cytokinesis. *Developmental cell*. 5:723-734.
